1 Vergence accuracy in an autostereoscopic display

2

3 Luca Lo Verde<sup>1,2</sup> and Anthony M. Norcia<sup>1,2</sup>

4

5 <sup>1</sup> Department of Psychology, Stanford University

6 <sup>2</sup> Wu Tsai Neurosciences Institute, Stanford University

7

8

9

10

11

12

13

14

15

16 **Acknowledgments:** Funded by a Stanford University Bio-X Interdisciplinary Initiatives Seed  
17 Grants Program (IIP) grant.

18

19 **Address for Correspondence:** Anthony M. Norcia ([amnorcia@stanford.edu](mailto:amnorcia@stanford.edu)); Wu Tsai  
20 Neurosciences Institute, 290 Jane Stanford Way, Stanford, CA 94305. +1 (650) 725-2438.

21 **Abstract**

22

23           When fixating an object, observers typically under or over-converge by a small amount, a  
24 phenomenon known as “fixation disparity”. Fixation disparity is typically measured with physical  
25 fixation targets and dichotically presented nonius lines. Here we made fixation disparity  
26 measurements with an autostereoscopic display, varying the retinal eccentricity and disparity of  
27 the fixation targets. Measurements were made in a group of four practiced observers and in a group  
28 of thirteen experimentally naïve observers. Fixation disparities with a zero-disparity target were in  
29 the direction of fixation behind the plane of the screen and the magnitude of the fixation disparity  
30 grew with the eccentricity of the fixation targets (1-5 deg in the practiced observers and 1 – 10 deg  
31 in the naïve observers). Fixation disparity also increased with increasing disparity of the targets,  
32 especially when they were presented at crossed disparities. Fixation disparities were larger overall  
33 for naïve observers who additionally did not converge in front of the screen when vergence demand  
34 was created by crossed disparity fusion locks presented at 5 and 10 deg eccentricities.

35

36 **Keywords:** stereoscopic display, vergence, binocular fusion, autostereoscopic display

37

38

## 39 **Introduction**

40           Observers with normal binocular vision typically fixate slightly in front of or behind an  
41 objective of regard, a phenomenon known as fixation disparity (Hoffmann and Bielschowsky,  
42 1900 ; Ogle et al., 1967). Fixation disparity is typically measured using dichoptic nonius lines to  
43 read-out the perceived visual direction of each eye and this measurement is generally well  
44 correlated with the pointing direction of the two eyes in observers with normal binocular vision  
45 (Hillis and Banks, 2001).

46           Fixation disparity can be exaggerated by imposing different degrees of retinal disparity on  
47 display elements. In the classical studies of fixation disparity, these image disparities were  
48 produced through the use of prisms (Ogle et al., 1967). Fixation disparity has also been reported  
49 to increase with increasing retinal eccentricity of disparate targets (Carter, 1964; Debysingh et al.,  
50 1986; Ukwade, 2000).

51           Measures of fixation disparity are commonly measured clinically with physical cards or  
52 devices and prisms (Mallett, 1964; Sheedy, 1980; Wesson and Koenig, 1983). Here we studied  
53 fixation disparity using a large-format lenticular autostereoscopic display in practiced and  
54 experimentally naïve observers. Changes on vergence demand were induced by disparate targets  
55 presented over a range of retinal eccentricities. Fixation disparity increased with both increasing  
56 vergence demand and retinal eccentricity of the stimulus to fusion, especially for crossed  
57 disparities (increased convergence demand) and for experimentally naïve observer

58

## 59 **Methods**

60

## 61 **Participants**

62 Two groups of observers participated. Four highly practiced participants (2 females, mean  
63 age:  $42 \pm 18$  years; range 31-69; two observers were co-authors of this work) were tested to tune  
64 the experimental parameters. These observers had normal- or corrected-to-normal vision, and  
65 normal stereoacuity.

66 A second, experimentally naive group of thirteen participants (7 females, mean age:  $19.9$   
67  $\pm 0.8$  years; range: 19-21 years old) were tested after being screened for having normal or corrected  
68 to normal visual acuity and stereoacuity (Bailey Lovie Eye Chart; Randot Stereotest). Consenting  
69 and experimental procedures were approved by the Institutional Review Board of Stanford  
70 University. The research conformed to the tenets of the Helsinki Convention.

71

## 72 **Apparatus and Stimuli**

73 The experiment was performed in a quiet room in total darkness. The stimuli were  
74 developed in MATLAB (The Mathworks, Inc., Natick, MA) using Psychtoolbox-3 (Brainard,  
75 1997; Pelli and Vision, 1997; Kleiner et al., 2007) and delivered using a SeeFront autostereoscopic  
76 3D monitor (SeeFront GmbH, Frankfurt, Germany; model SF3D320-MP). A schematic  
77 representation of the stimulus configuration, depicted as a red/blue anaglyph for visualization  
78 purposes, is shown in Figure 1A. Nonius lines were used as a high-precision subjective indicator  
79 of vergence posture (McKee and Levi, 1987). The dichoptic nonius lines were gray, 21 minutes of  
80 arc long and were vertically separated by 36.5 minutes of arc. The top nonius lines was delivered  
81 to the right eye and fixed in position, always presented in the center of the screen and in the center

82 of the right eye fusion lock component. The participant could adjust the horizontal position of the  
83 other nonius line using a track wheel device. The initial position of the adjustable nonius line  
84 varied pseudo-randomly on each trial, with a maximum possible displacement of 14.4 arcmin from  
85 the screen center. The background was black.

86 The binocular fusion lock consisted of a radial pattern composed of four circular sectors  
87 surrounding the nonius lines. The fusion lock could be placed at different retinal eccentricities  
88 around the nonius stimuli: four eccentricities for the pilot data collection (1°, 1.25°, 2.5° and 5°  
89 of eccentricity) and three eccentricities for the main data pool (1°, 5° and 10° of eccentricity).  
90 These eccentricities were defined as the distance from the screen center and the inner radius of  
91 the four circular sectors around the nonius lines. The circular sector sizes were scaled to equate  
92 their visibility according the cortical magnification factor (Baseler et al., 1994) and thus the  
93 fusion locks presented at higher eccentricities were larger than the ones presented closer to the  
94 center of the visual field. The equation used to estimate the cortical area  $A$  subtended by circular  
95 sectors is the following:

$$96 \quad A = 300 * \frac{2\pi}{360} * \theta * \left[ \frac{0.75 * (r_o - r_i)}{(r_i + 0.75) * (r_o + 0.75)} + \ln \left( \frac{r_i + 0.75}{r_o + 0.75} \right) \right]$$

97  
98 Where  $\theta$  represents the angle of a given circular sector,  $r_i$  represents the inner radius between the  
99 screen center and the inner margin of each circular sector, and  $r_o$  represents the outer radius  
100 between the screen center and the outer margin of each circular sector. The fusion lock was  
101 presented at thirteen different horizontal disparities (6 crossed and 6 uncrossed disparities plus  
102 zero disparity: 0°, ±0.05°, ±0.1°, ±0.2°, ±0.4°, ±0.6° and ±0.8°).

103

## 104 Procedure

105 Participants sat comfortably 70 cm from the monitor. They held a rotary USB input device  
106 used for collecting responses. Experimentally naive participants were familiarized with the stimuli  
107 and task by having them perform 5 training trials. Practiced observers had extensive experience  
108 with the task prior to data collection. Each trial began with a blank, dark screen, followed by the  
109 appearance of the fusion lock stimulus, presented at zero disparity for 750 msec. Subsequently,  
110 the fusion lock assumed the designated disparity for that trial and the nonius lines appeared in the  
111 center of the screen. The participants were asked to focus on the central nonius lines and to ignore  
112 the surrounding radial fusion lock pattern. These stimuli remained visible on the screen until the  
113 end of the trial.

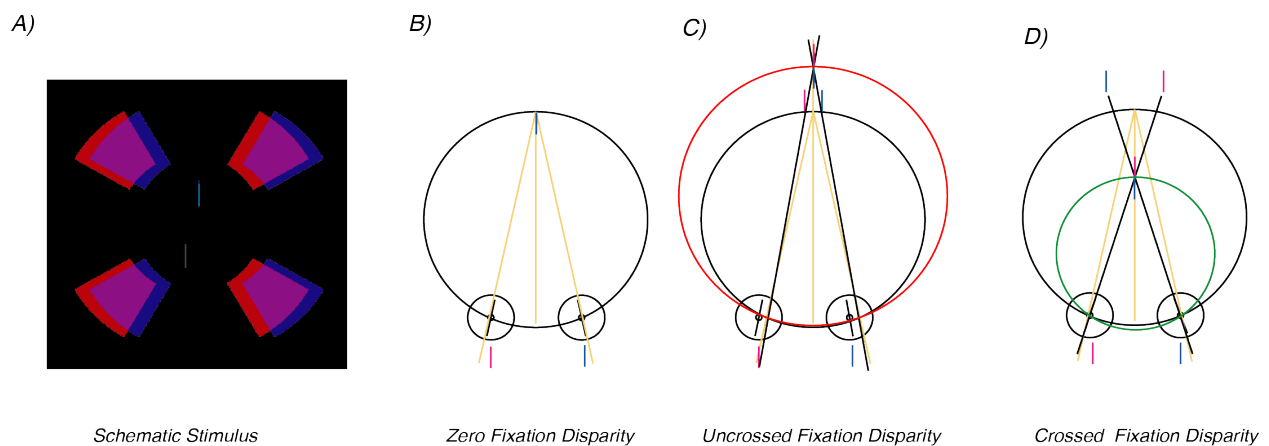

115

116 **Figure 1.** A) Schematic representation of the stimuli, in this case depicting the dichoptic fusion lock with 1 deg of  
117 eccentricity and 0.2 degrees of uncrossed disparity. In this anaglyphic representation, the magenta portions of the  
118 stimuli are delivered to the left eye while the blue ones are seen by the fellow eye (every component of the stimulus  
119 was gray in the actual experiment). We manipulated both eccentricity and disparity of the fusion lock surrounding the  
120 nonius lines. The upper nonius line was always a fixed reference, while the participants could adjust the horizontal  
121 position of the lower, probe nonius line to perceptually align them. B) Zero fixation disparity. Physically aligned  
122 nonius lines at the plane of the screen (black curve) are subjectively aligned with zero nonius offset. C) Uncrossed  
123 fixation disparity. The eyes are diverged relative to the plane of the screen, subjectively aligned targets have a negative  
124 nonius offset. D) Crossed fixation disparity. The eyes are converged relative to the plane of the screen, subjectively  
125 aligned targets have a positive nonius offset.

126

127           The participants used the rotary input device to adjust the position of the probe nonius line  
128 until they perceived the two nonius lines as vertically aligned. The device allowed them to  
129 progressively and smoothly move the probe nonius line in either horizontal direction (step size: 1  
130 pixel  $\approx$  1.80 minutes of arc) to align the vertical nonius lines. The participants pressed a dedicated  
131 button on the response device to proceed to the next trial once they were satisfied with the  
132 perceived alignment of the nonius lines.

133           Figure 1B illustrates the case of zero fixation disparity. Here physically aligned nonius  
134 lines are seen as subjectively aligned, indicating that vergence was on the plane of the screen,  
135 indicated by the black Vieth-Müller circle presented as an approximation of the empirical horopter.  
136 Fig. 1C indicates the case of uncrossed fixation disparity where the eyes are diverged relative to  
137 the plane of the screen and subjective alignment occurs with a negative nonius offset, under our  
138 convention. Fig. 1D indicates the case of a crossed fixation disparity where the eyes are converged  
139 relative to the plane of the screen and subjective alignment occurs with a positive nonius offset,  
140 under our convention.

141           There were no time constraints on the perceptual alignment task, and the participants were  
142 instructed to achieve a stable alignment before finishing a given trial. Each experimental session  
143 consisted of 6 trial repetitions for each of the 3 fusion lock eccentricities (4 fusion lock  
144 eccentricities for the experienced observers pool) and the 13 fusion lock disparities, for a total of  
145 246 trials per participant, split in 3 separate blocks each consisting of 82 trials.

146

## 147 **Conventions**

148 We adopted the disparity conventions in widespread use across classical optometry works (Ogle  
149 et al., 1967) by assigning uncrossed fusion lock disparities to the positive range of the presented  
150 disparity axis while the crossed disparity fusion locks are assigned negative values.

151 We first computed deviations from each presented vergence demand by subtracting the actual  
152 vergence demand from the final adjusted position of the participants-controlled nonius line  
153 which had to be perceptually aligned with the other, fixed nonius line. Therefore, a positive  
154 (negative) deviation indicates a failure to converge (diverge) the eyes enough to have each  
155 dichoptic fusion mask lie on each corresponding points on the two retinae. We computed these  
156 deviations for the three fusion lock eccentricities as a function of vergence load, as well as  
157 having the deviations for each vergence load as a function of fusion lock eccentricity to better  
158 visualize the influence of these variables on the task.

159

## 160 **Results**

161

162 The relative alignment of the nonius lines was continuously tracked until they were perceptually  
163 aligned. Figure 2 A-D shows example time-courses of the alignment judgements for each of the  
164 fusion lock eccentricities for the zero-disparity fusion lock condition (1.0, 1.25, 2.5 and 5 deg for  
165 the practiced observers pool and 1.0, 5 and 10 deg for the naïve participants pool, respectively).

166 The data are from the four practiced observers in panels A-D and the thirteen naïve observers in  
167 E-G. The zero-disparity condition represents a conventional estimate of fixation disparity, but with  
168 eccentric fixation locks. The average fixation disparity increased with the eccentricity of the fusion  
169 lock (dashed line), as did the variability of the setting (red band). The dashed red lines indicate the



170 average of the final adjustment before trial end for each participant, and the red shade represents  
171 the standard error of the means.

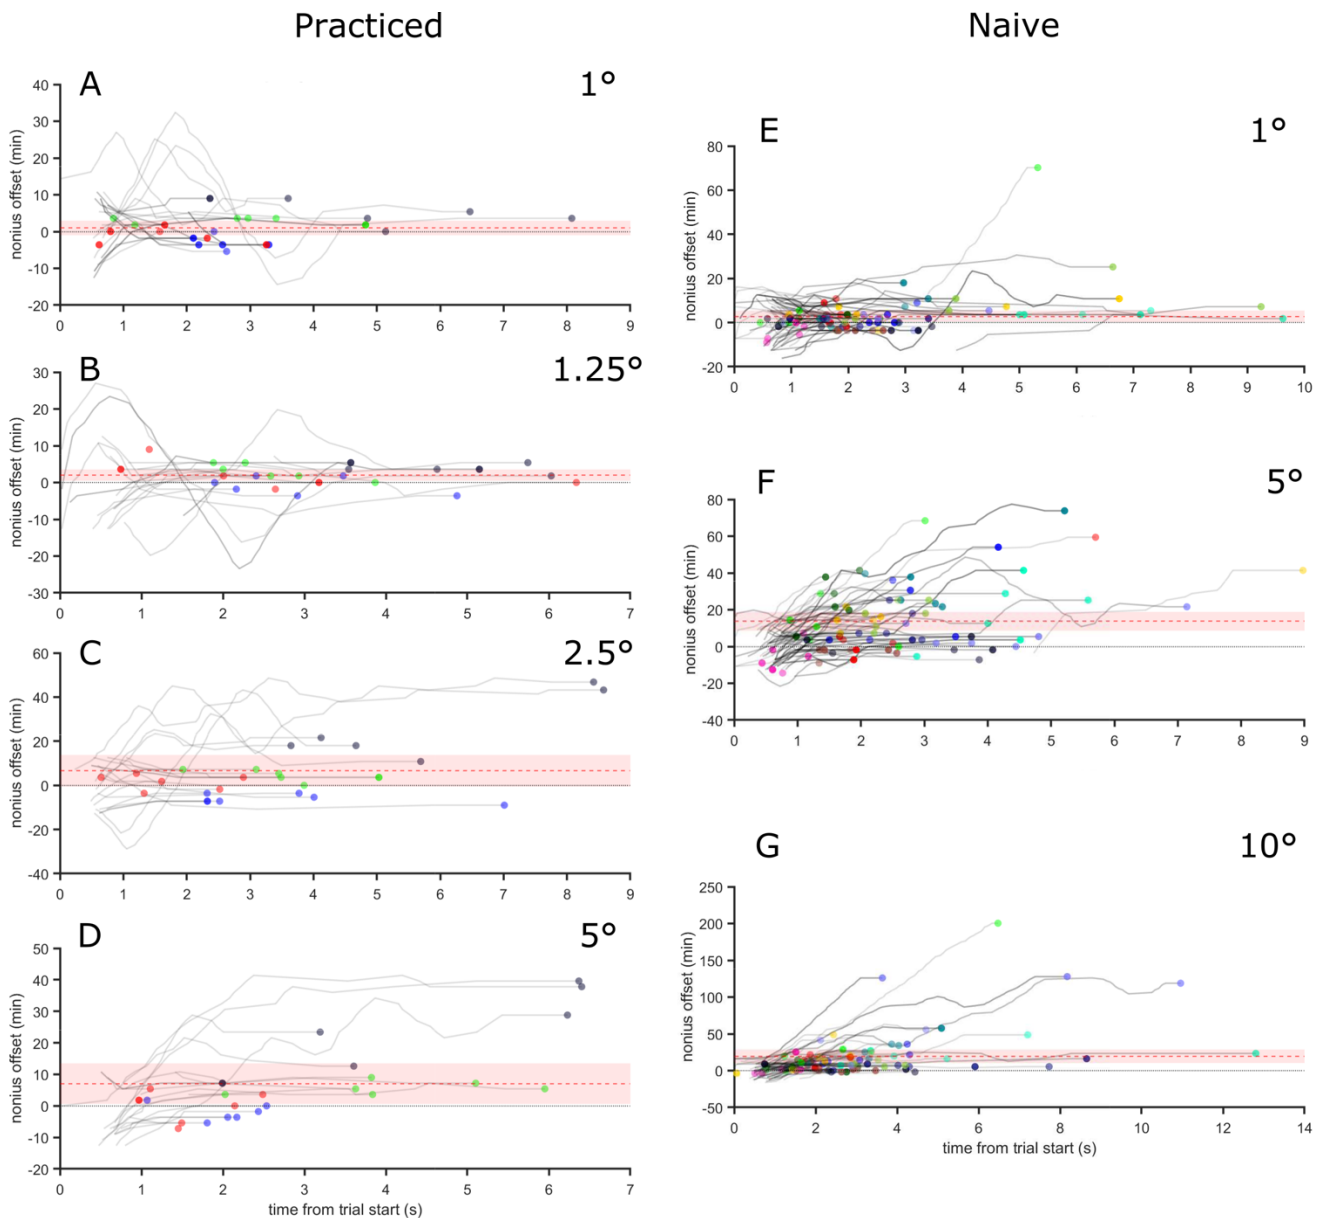

172

173

174 **Figure 2.** Time course of the nonius position adjustments from trial onset, plotted for each fusion lock eccentricities  
175 (A: 1°; B: 1.25°; C: 2.5°; D: 5°) for the zero-disparity condition for the practiced participant pool. Each color  
176 represents a single participant, the red dashed line represents the average of the final nonius position across all  
177 participants, the light red area defines the standard error of the mean. E-G) data from the 13 naïve participants using  
178 the same convention.

179

180 The full data sets over all fixation lock disparities and eccentricities are shown in Figure 3.  
181 The dashed diagonal lines indicate the imposed disparity of the fusion lock and thus the vergence  
182 demand. For both practiced and naïve observers, the nonius offset for subjective alignment  
183 accurately tracks the disparity of the low-eccentricity, uncrossed fusion locks (1 deg in both groups  
184 (light blue curves in both A and B) and additionally at 1.25 deg eccentricity in the practiced group  
185 but undershoots it for crossed disparities especially in the naïve observers (compare Fig. 3 A to  
186 B). As the eccentricity of the fusion lock increases to 2.5, 5 and 10 deg eccentricity, the nonius  
187 offset setting increasingly fails to track the disparity of the fusion lock, especially for crossed  
188 disparities (see Fig. 2 C, D and F, G). The divergence of the nonius settings from the imposed  
189 demand implies that the eyes are less converged or diverged than the demand imposed by the  
190 disparity of the fusion lock. Notably, in the naïve observers, the nonius offset for crossed fusion  
191 locks are on the uncrossed side for the largest fusion lock disparities.

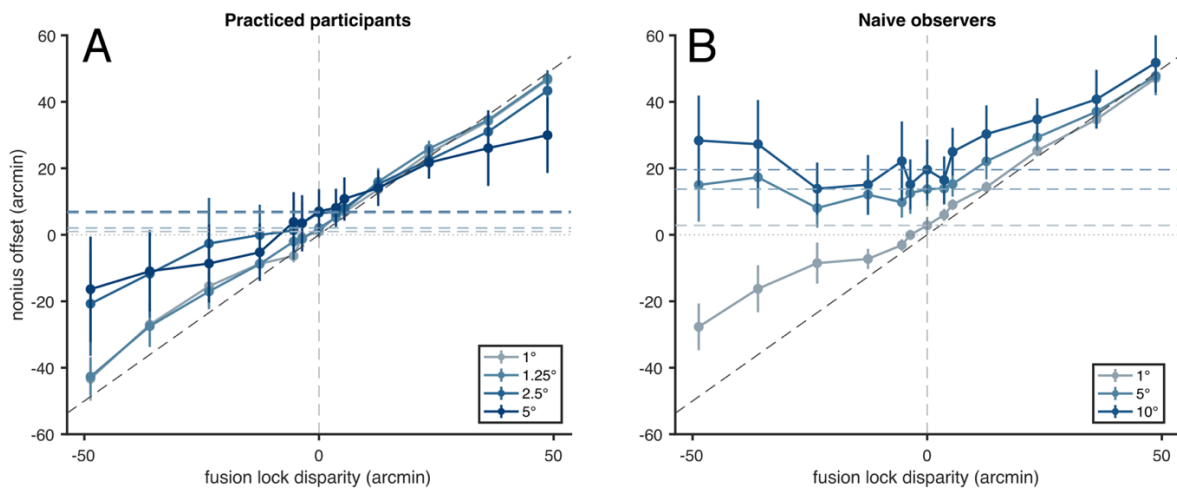

192

193 **Figure 3.** Nonius offset settings for practiced (A) and Naïve observers (B). Eccentricities in degrees are reported in  
194 the legends.

195

196

197

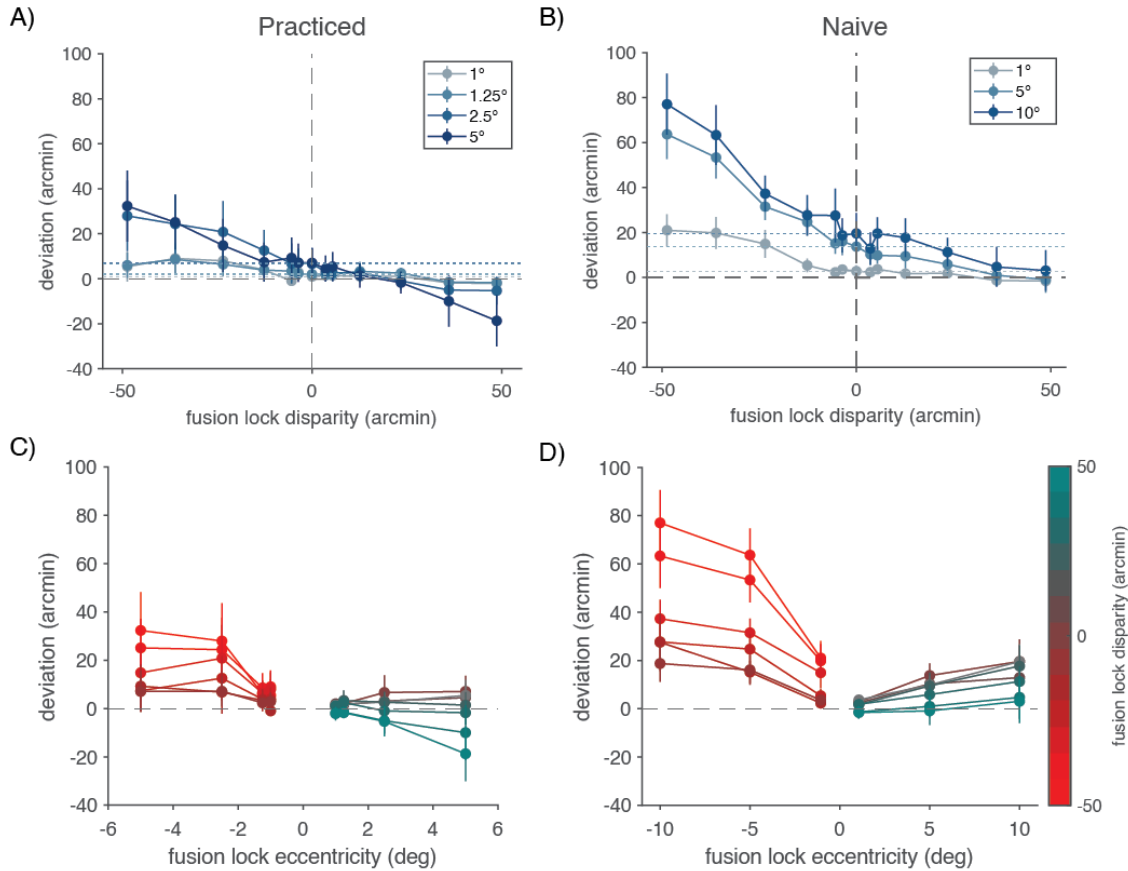

198

199 **Figure 4.** Deviations of settings from vergence demand. A) Deviation as a function of fusion lock disparity for  
 200 practiced observers. Deviation grows with increasing fusion lock, especially for larger crossed disparities. B)  
 201 Deviation as a function of fusion lock disparity for naive observers. Trends in experience observers are exaggerated.  
 202 C) Deviation as a function of fusion lock eccentricity for practiced observers. Deviation increases for more eccentric  
 203 fusion locks, especially for crossed disparity. D) Deviation as a function of fusion lock eccentricity for naive observers.  
 204 Trends in practiced observers are exaggerated in the naive observers. For visibility purposes, we translated the  
 205 negative fusion lock disparities curves (plotted in shades of red) to negative eccentricities in C and D.  
 206

207 To better visualize the magnitude of the biases, we transformed the nonius offsets in  
 208 deviations from imposed vergence load and visualized the data of Figure 3 in two ways: first as a  
 209 function of fusion lock disparity, with eccentricity as the parameter and then as a function of  
 210 disparity with eccentricity as the parameter. At zero disparity and 1 degree of eccentricity, the  
 211 fixation disparity in the practiced observers was  $0.98 \pm 1.97$  arcmin and in the naive observers it  
 212 was  $2.82 \pm 2.6$  arcmin. At 5 deg, where both groups provided data, these values were  $7.06 \pm 6.44$

213 arcmin and  $13.73 \pm 5.1$  arcmin, respectively. At 10 degrees of eccentricity (for the naïve  
214 participants pool), the fixation disparity was  $19.58 \pm 9.13$  arcmin.

215 As the disparity of the fusion lock increases, nonius offset deviation remains essentially  
216 constant for all uncrossed disparities when the fusion lock eccentricity is 1 deg in both groups and  
217 1.25 deg in the practiced observers. At 2.5 deg and higher fusion lock eccentricities, the zone where  
218 fixation disparity is small shrinks to disparities less than  $\approx 5.41$  arcmin. The fixation disparity  
219 increases with eccentricity for all disparities, especially for crossed disparities and larger disparity  
220 magnitudes in both groups. The asymmetry in settings between crossed and uncrossed disparities  
221 is readily apparent when deviation is plotted as a function of eccentricity for the two disparity signs  
222 (Fig 4 C, D).

223

## 224 **Discussion**

225

226 Our results with an autostereoscopic display qualitatively recapitulate results from the  
227 clinical and psychophysical literatures. We find that the degree of nonius misalignment increases  
228 with increasing disparity of the fusion locks. Increasing the disparity of the fusion lock mimics the  
229 addition of prisms as used in clinical studies or the use of mirror deflectors (Schor et al., 1986),  
230 but does not induce a shift of all visible elements over the visual field. In our case, only the fusion  
231 lock stimuli varied in disparity, but the monitor bezel and the dimly lit room surround did not.

232 In both observer groups, fixation disparity measured with a zero-disparity fusion lock is  
233 positive, meaning that the eyes are converged behind the plane of the display. The magnitude of  
234 the fixation disparity increases in both groups as the fusion lock eccentricity increases, as observed  
235 in previous studies (Carter, 1964; Debysingh et al., 1986; Ukwade, 2000).

236           As increasing disparity is introduced into the fusion lock, the nonius offset directly tracks  
237 the magnitude of the imposed disparity for uncrossed fusion locks when the eccentricity of the  
238 fusion lock is low (*e.g.* 1 to 1.25 deg). The uncrossed fusion locks are portrayed behind the plane  
239 of the monitor. At larger eccentricities, the nonius offset fails to track the imposed disparity by  
240 increasing amounts in the practiced observers (see Fig 3C and D). In the naïve observers the nonius  
241 offset matches the largest of the imposed uncrossed disparities, but over- compensates in the  
242 uncrossed direction for smaller fusion lock disparities (see Fig. 3 F and G).

243           The crossed disparity fusion locks render the images in front of the plane of the monitor.  
244 In both observer groups, for the smallest fusion lock eccentricities, the nonius offset tracks the sign  
245 of the disparity, but fails to keep up with the magnitude of the disparity (see Fig. 3 A,B and E). In  
246 the practiced group, the function is shallower than the imposed disparity demand for both signs of  
247 disparity and by 5 deg of eccentricity, the effect is approximately symmetric for crossed and  
248 uncrossed disparities. In the naïve observers, the presentation of crossed disparity fusion locks fails  
249 to drive convergence in front of the plane of the monitor at 5 and 10 deg eccentricities of the fusion  
250 lock – fusion lock disparity has no effect and does not alter the fixation disparity value measured  
251 for zero disparity.

252           Previous research on the perception of depth from disparity has compared stereoacuity for  
253 simple real-world targets and simulated versions of them presented in a stereoscope (McKee and  
254 Taylor, 2010). For two unpracticed observers, depth thresholds in the stereoscope were much  
255 worse than their real-space depth thresholds. Superiority of cue integration has also been reported  
256 for real versus stereoscopically simulated displays (Buckley and Frisby, 1993). The  
257 autostereoscopic and other types of dichoptic viewing system inherently present conflicts between  
258 disparity cues and accommodation/proximity cues and this may affect the perception of depth from

259 the fusion locks. However, this can't be the whole explanation as cue conflict is equal over the  
260 different fusion lock eccentricities. In the naïve observers, performance is relatively good for the  
261 1 deg fusion lock eccentricity, but not for the 5 and 10 deg eccentricities. This suggests another  
262 factor – peripheral disparity sensitivity – may be at play. Peripheral stereoacuity can improve more  
263 than central visual acuity with practice, at least in some observers (Fendick and Westheimer, 1983)  
264 and it is possible that the naïve observers are not as able to use peripheral disparity information in  
265 the context of our experimental conditions.

266

267  
268  
269  
270  
271  
272  
273  
274  
275  
276  
277  
278  
279  
280  
281  
282  
283  
284  
285  
286  
287  
288  
289

## References

- Baseler HA, Sutter EE, Klein SA, Carney T (1994) The topography of visual evoked response properties across the visual field. *Electroencephalogr Clin Neurophysiol* 90:65-81.
- Brainard DH (1997) The Psychophysics Toolbox. *Spat Vis* 10:433-436.
- Buckley D, Frisby JP (1993) Interaction of stereo, texture and outline cues in the shape perception of three-dimensional ridges. *Vision Res* 33:919-933.
- Carter DB (1964) Fixation Disparity with and without Foveal Fusion Contours. *Am J Optom Arch Am Acad Optom* 41:729-736.
- Debysingh SJ, Orzech PL, Sheedy JE (1986) Effect of a central fusion stimulus on fixation disparity. *Am J Optom Physiol Opt* 63:277-280.
- Fendick M, Westheimer G (1983) Effects of practice and the separation of test targets on foveal and peripheral stereoacuity. *Vision Res* 23:145-150.
- Hillis JM, Banks MS (2001) Are corresponding points fixed? *Vision Res* 41:2457-2473.
- Hoffmann FB, Bielschowsky A (1900 ) Ueber die der Willkur entzogenen Fusions-bewegungen der Augen. *Arch f d ges Physiol* 80:1-40.
- Kleiner M, Brainard D, Pelli D (2007) What's new in Psychtoolbox-3?
- Mallett RJF (1964) The investigation of heterophoria at near and a new fixation disparity technique. *Optician* 148:573-581.
- McKee SP, Levi DM (1987) Dichoptic hyperacuity: the precision of nonius alignment. *J Opt Soc Am A* 4:1104-1108.
- McKee SP, Taylor DG (2010) The precision of binocular and monocular depth judgments in natural settings. *J Vis* 10:5.

- 290 Ogle KN, Martens TG, Dyer TA (1967) Oculomotor Imbalance in Binocular Vision and Fixation  
291 Disparity. Philadelphia: Lea and Febiger.
- 292 Pelli DG, Vision S (1997) The VideoToolbox software for visual psychophysics: Transforming  
293 numbers into movies. *Spatial vision* 10:437-442.
- 294 Schor C, Wesson M, Robertson KM (1986) Combined effects of spatial frequency and retinal  
295 eccentricity upon fixation disparity. *Am J Optom Physiol Opt* 63:619-626.
- 296 Sheedy JE (1980) Fixation disparity analysis of oculomotor imbalance. *Am J Optom Physiol Opt*  
297 57:632-639.
- 298 Ukwade MT (2000) Effects of nonius line and fusion lock parameters on fixation disparity.  
299 *Optom Vis Sci* 77:309-320.
- 300 Wesson MD, Koenig R (1983) A new clinical method for direct measurement of fixation  
301 disparity. *South J Optom* 1:48-52.  
302
